# Supplementary material for: Growth, structural and vibrating properties of CdSe–Ge, CdSe–Ge–CdSe, CdSe–Ge/Ge, Ge–GeSe heterostructure nanowires and GeSe nanobelts
Source: Royal Society of Chemistry journal article supplement (doi:10.1039/c0ce00729c), 2011-01-01
Supplement: c0ce00729c.pdf [file c0ce00729c.pdf]

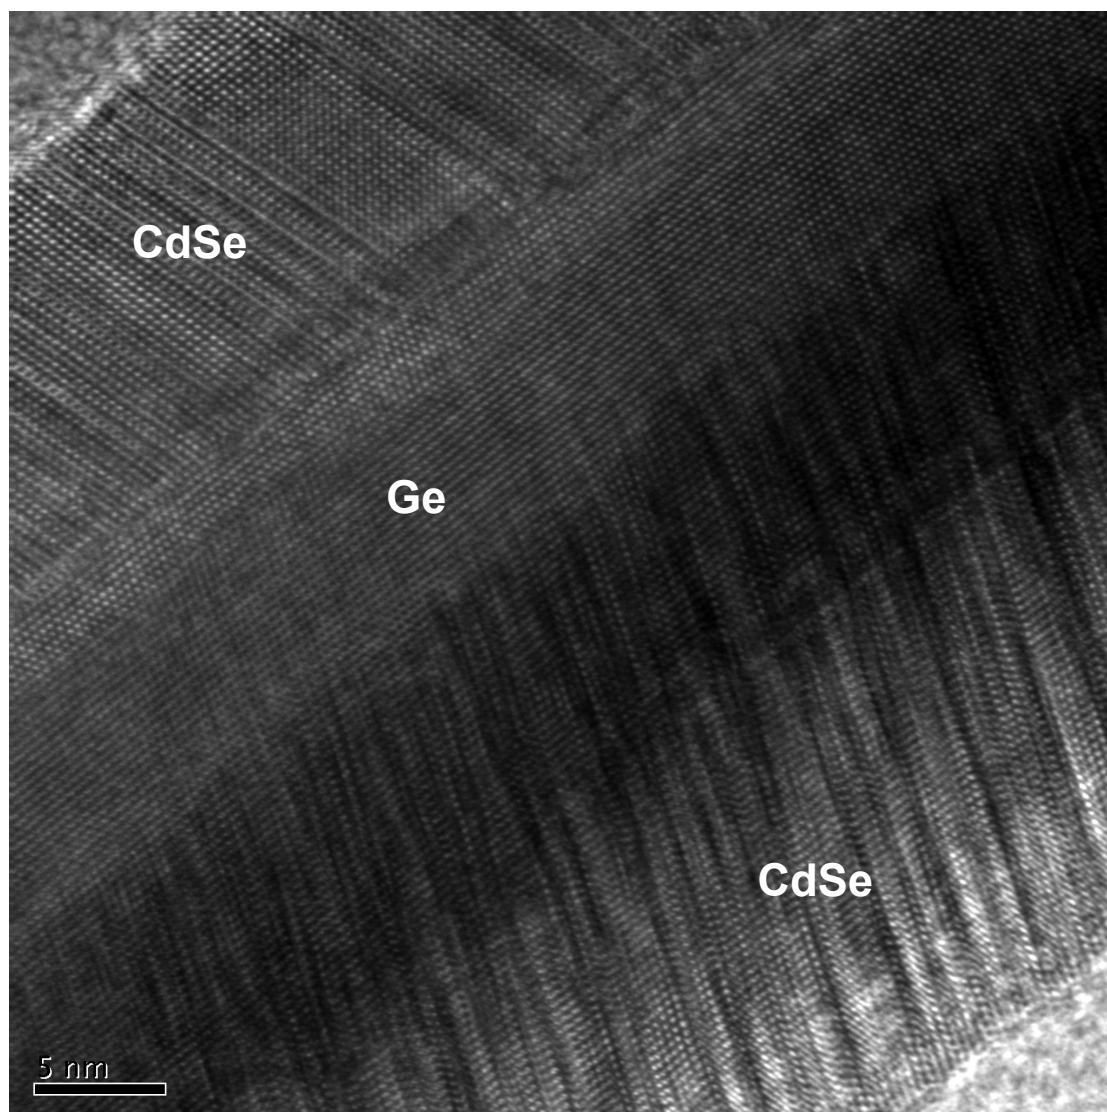

Fig. S1. HRTEM image of two interfaces in the sandwich-like triaxial nanowire between CdSe and Ge subnanowires. Both of the lower CdSe and the upper CdSe section have stacking defects
